# Supplementary material
Source: HighWire-hosted journal article supplement (https://www.onlinejacc.org/content/61/4/440)

(A)

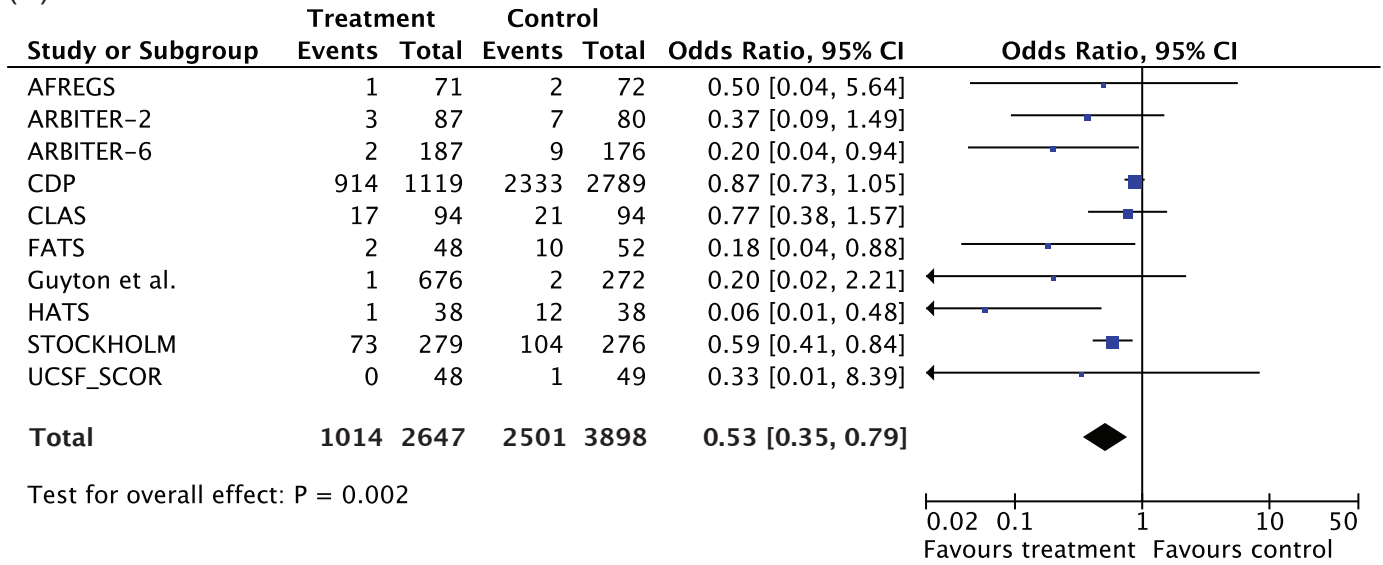

(B)

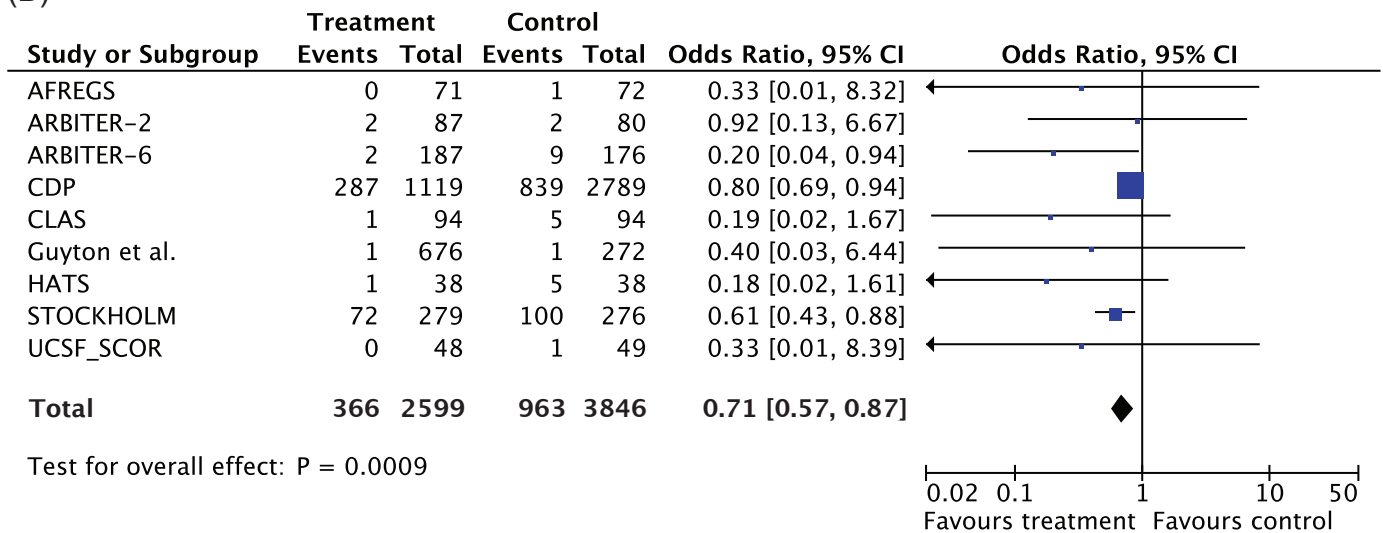

(C)

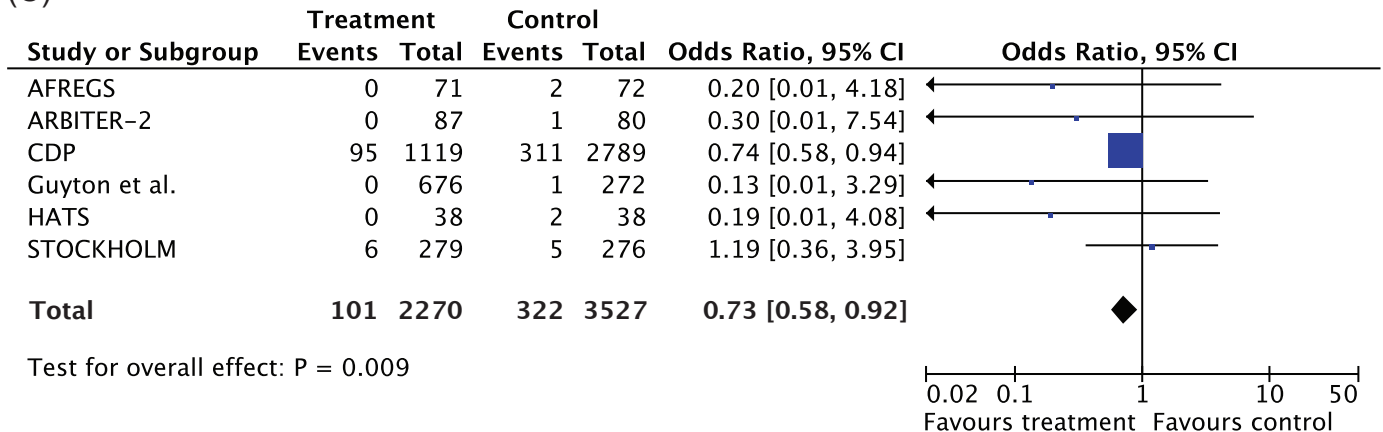

Supplement: media-3 [file media-3.pdf]
